# Supplementary material for: Small variation induces a big difference: the effect of polymerization kinetics of graphitic carbon nitride on its photocatalytic activity
Source: Royal Society of Chemistry journal article supplement (doi:10.1039/d4dt00042k), 2024-01-01
Supplement: d4dt00042k1.pdf [file d4dt00042k1.pdf]

*Electronic Supplementary Information for*

# Small variation induces big difference: the effect of polymerization kinetics of graphitic carbon nitride on its photocatalytic activity

Tong Li,<sup>a</sup> Bo Lai,<sup>a</sup> Jing Liu,<sup>a</sup> Shuangtao Yuan,<sup>a</sup> Nan Liu,<sup>b</sup> Xiaojia Zhao,<sup>c</sup> Xiaoguang Luo,<sup>d</sup>

Dongli Yu\*<sup>a</sup> and Yuanchun Zhao\*<sup>a</sup>

<sup>a</sup> State Key Laboratory of Metastable Materials Science and Technology, Yanshan University,  
Qinhuangdao 066004, China

<sup>b</sup> Department of Environmental Sciences, Hebei University of Environmental Engineering,  
Qinhuangdao 066102, China

<sup>c</sup> Department of Chemistry, Hebei Normal University, Shijiazhuang 050030, China

<sup>d</sup> Department of Electronics, College of Electronic Information and Optical Engineering, Nankai  
University, Tianjin 300071, China

\* *Corresponding authors E-mail: ydl@ysu.edu.cn, yzhao56@ysu.edu.cn*

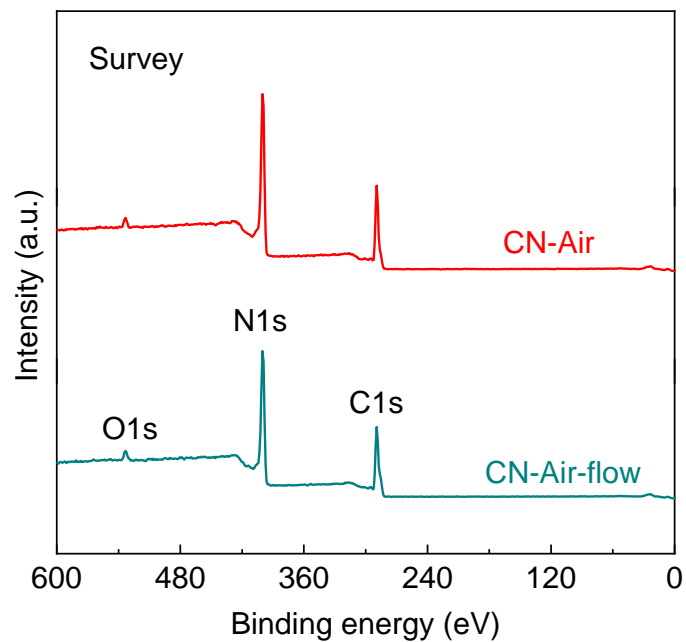

**Fig. S1** XPS survey spectra of CN-Air and CN-Air-flow.

**Table S1** The relative integrated content of each bonding state determined in the deconvoluted C 1s, N 1s and O 1s XPS spectra of CN-Air and CN-Air-flow.

| Sample      | C 1s                              |                                   |                                  | N 1s                              |                                  |                                  |                                 | O 1s                               |                                   |
|-------------|-----------------------------------|-----------------------------------|----------------------------------|-----------------------------------|----------------------------------|----------------------------------|---------------------------------|------------------------------------|-----------------------------------|
|             | C <sub>ad</sub> (%)<br>(284.6 eV) | C <sub>3N</sub> (%)<br>(288.1 eV) | C <sub>C-O</sub> (%)<br>(289 eV) | N <sub>2C</sub> (%)<br>(398.5 eV) | N <sub>A</sub> (%)<br>(399.4 eV) | N <sub>B</sub> (%)<br>(400.2 eV) | N <sub>3C</sub> (%)<br>(401 eV) | O <sub>C-O</sub> (%)<br>(531.1 eV) | O <sub>ad</sub> (%)<br>(532.3 eV) |
| CN-Air      | 16.17                             | 80.41                             | 3.42                             | 70.60                             | 13.72                            | 7.37                             | 8.31                            | 84.40                              | 15.60                             |
| CN-Air-flow | 21.81                             | 75.09                             | 3.10                             | 73.01                             | 9.89                             | 6.98                             | 10.11                           | 65.46                              | 34.54                             |

**Table S2** Compositions and atomic C/N ratios of CN-Air and CN-Air-flow determined by XPS and elemental analysis (EA), respectively.

| Sample      | XPS      |          |          |      | EA       |          |          |      |
|-------------|----------|----------|----------|------|----------|----------|----------|------|
|             | C (at %) | N (at %) | O (at %) | C/N  | C (at %) | N (at %) | H (at %) | C/N  |
| CN-Air      | 44.60    | 53.56    | 1.84     | 0.83 | 32.39    | 49.10    | 18.51    | 0.66 |
| CN-Air-flow | 46.12    | 51.42    | 2.46     | 0.89 | 32.87    | 49.76    | 17.37    | 0.66 |

**Table S3** Fitted PL decay components of CN-Air and CN-Air-flow.

| Sample      | Decay time (ns) |          |          | Relative amplitude (%) |       |       | Average lifetime <sup>a</sup><br>( $A_\tau$ , ns) |
|-------------|-----------------|----------|----------|------------------------|-------|-------|---------------------------------------------------|
|             | $\tau_1$        | $\tau_2$ | $\tau_3$ | $a_1$                  | $a_2$ | $a_3$ |                                                   |
| CN-Air      | 1.47            | 5.44     | 30.8     | 29.91                  | 49.54 | 20.55 | 22.22                                             |
| CN-Air-flow | 1.25            | 4.75     | 29.1     | 27.10                  | 50.05 | 22.85 | 21.91                                             |

<sup>a</sup>Average lifetimes were calculated based on the equation:  $A_\tau = (a_1\tau_1^2 + a_2\tau_2^2 + a_3\tau_3^2) / (a_1\tau_1 + a_2\tau_2 + a_3\tau_3)$ .

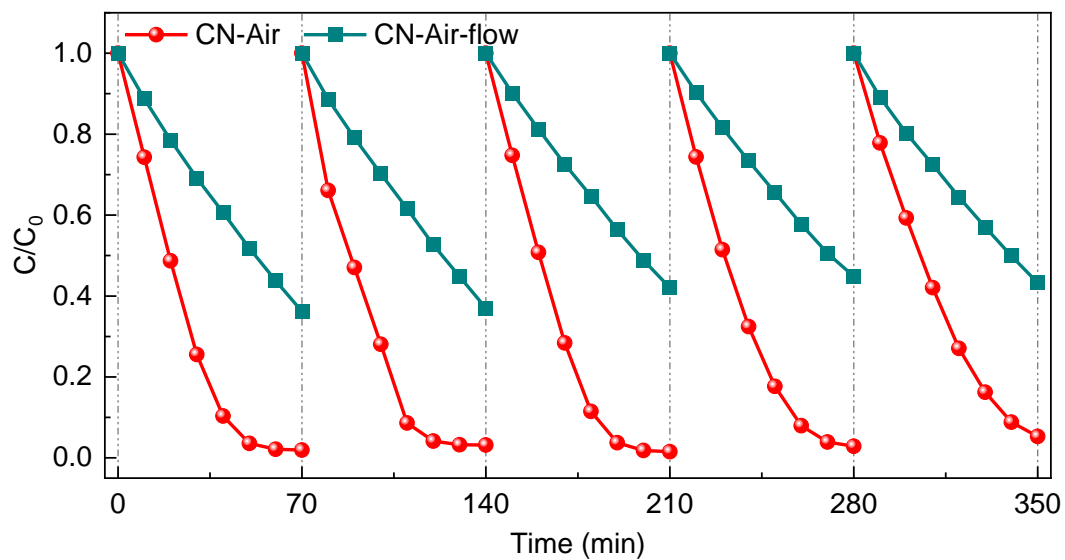

**Fig. S2** Recycling RhB degradation tests for CN-Air and CN-Air-flow, respectively.

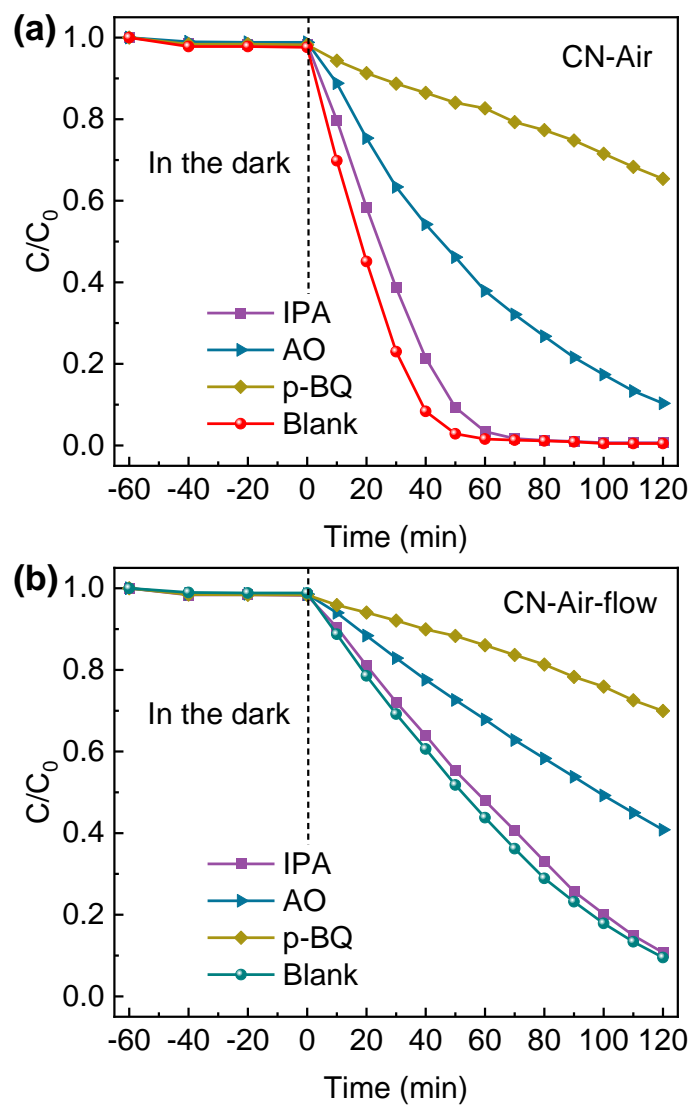

**Fig. S3** Trapping experiments for the degradation of RhB under visible light irradiation ( $\lambda > 420$  nm) without (blank) or with different scavengers catalyzed by (a) CN-Air and (b) CN-Air-flow, respectively.

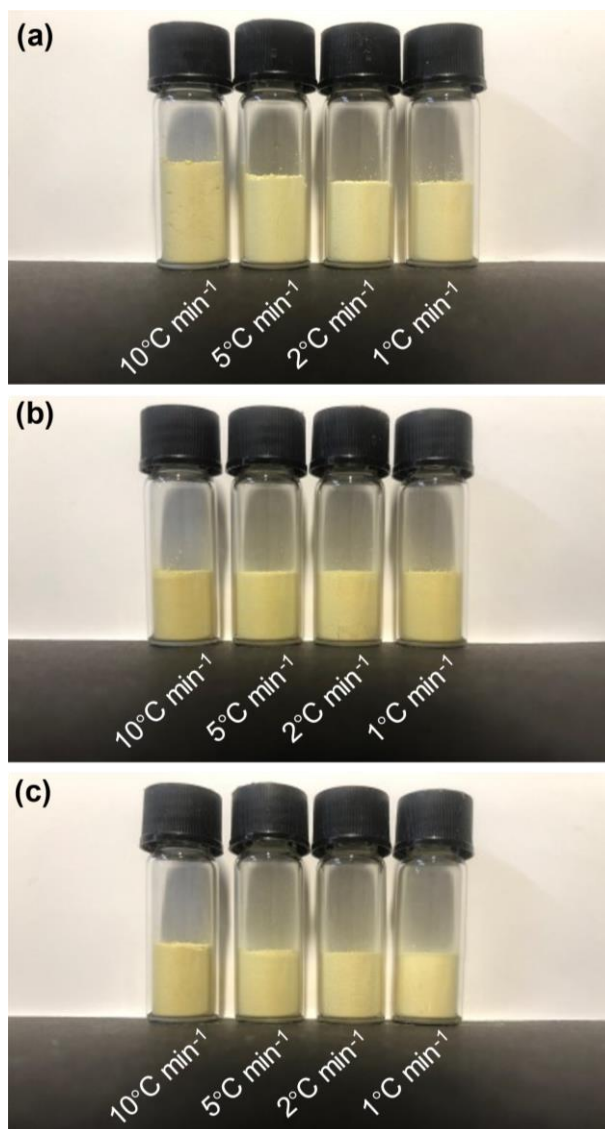

**Fig. S4** Photograph of the synthesized samples with an identical weight of 300 mg by changing the ramping rate under different atmospheres (a) in the static air, (b) in the flowing air and (c) in the flowing N<sub>2</sub>, respectively. 10 g of melamine was used as precursor for all the g-CN samples.

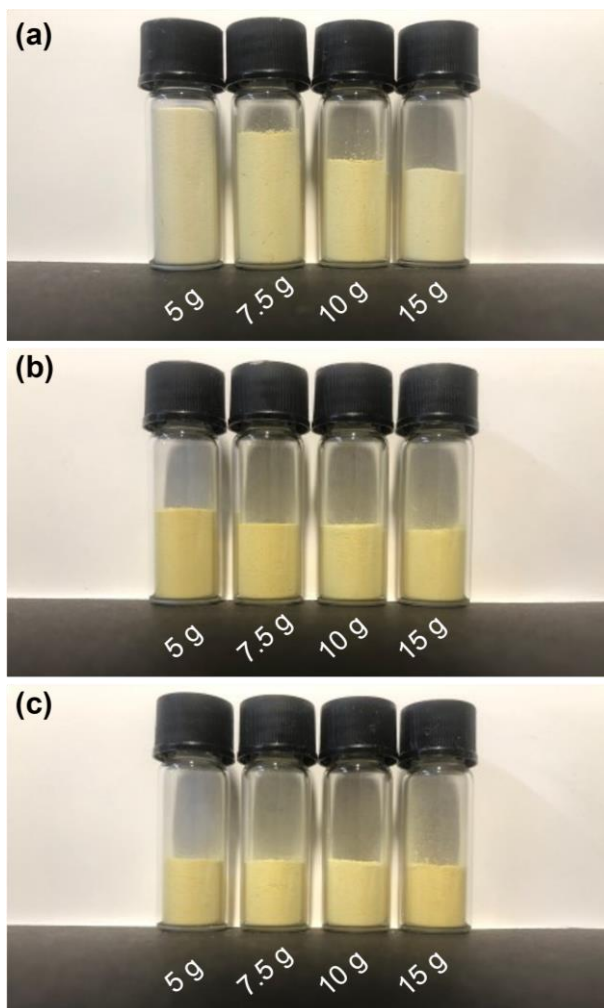

**Fig. S5** Photograph of the synthesized samples with an identical weight of 300 mg by changing the loading amount of melamine under different atmospheres (a) in the static air, (b) in the flowing air and (c) in the flowing N<sub>2</sub>, respectively. The condensation process was conducted with a ramping rate of 10 °C min<sup>-1</sup>.



**Table S4** A summary of the experimental details and PHE performance of conventional bulk g-CN reported in some literatures and this work.

| Precursor     | Precursor amount (g) | Synthetic atmosphere   | Ramping rate ( $^{\circ}\text{C min}^{-1}$ ) | Condensation procedure                    | HER <sup>a</sup> ( $\mu\text{mol g}^{-1} \text{h}^{-1}$ ) | AQE (%) <sup>b</sup> | Note                                                            | Ref.      |
|---------------|----------------------|------------------------|----------------------------------------------|-------------------------------------------|-----------------------------------------------------------|----------------------|-----------------------------------------------------------------|-----------|
| Melamine      | 5                    | Static air             | 10                                           | 550 $^{\circ}\text{C} \times 4 \text{ h}$ | 415.2                                                     | N/A                  | Production yield: 12.7 %                                        | This work |
| Melamine      | 10                   | Static air             | 10                                           | 550 $^{\circ}\text{C} \times 4 \text{ h}$ | 229.3                                                     | 0.33                 | Production yield: 24.5 %                                        | This work |
| Melamine      | 10                   | Static air             | 1                                            | 550 $^{\circ}\text{C} \times 4 \text{ h}$ | 157.0                                                     | N/A                  | Production yield: 29.9 %                                        | This work |
| Melamine      | 5                    | Flowing air            | 10                                           | 550 $^{\circ}\text{C} \times 4 \text{ h}$ | 137.9                                                     | N/A                  | Production yield: 24.8 %                                        | This work |
| Melamine      | 10                   | Flowing air            | 10                                           | 550 $^{\circ}\text{C} \times 4 \text{ h}$ | 98.9                                                      | 0.12                 | Production yield: 33.2 %                                        | This work |
| Melamine      | 10                   | Flowing air            | 1                                            | 550 $^{\circ}\text{C} \times 4 \text{ h}$ | 67.9                                                      | N/A                  | Production yield: 36.5 %                                        | This work |
| Melamine      | 5                    | Flowing N <sub>2</sub> | 10                                           | 550 $^{\circ}\text{C} \times 4 \text{ h}$ | 107.1                                                     | N/A                  | Production yield: 27.3 %                                        | This work |
| Melamine      | 10                   | Flowing N <sub>2</sub> | 10                                           | 550 $^{\circ}\text{C} \times 4 \text{ h}$ | 83.9                                                      | N/A                  | Production yield: 34.8 %                                        | This work |
| Melamine      | 10                   | Flowing N <sub>2</sub> | 1                                            | 550 $^{\circ}\text{C} \times 4 \text{ h}$ | 58.9                                                      | N/A                  | Production yield: 38.3 %                                        | This work |
| Cyanamide     | 1                    | N/A                    | 2.2                                          | 550 $^{\circ}\text{C} \times 4 \text{ h}$ | 106.9                                                     | 0.10                 |                                                                 | S1        |
| Dicyandiamide | 1                    | Static air             | 2.3                                          | 550 $^{\circ}\text{C} \times 4 \text{ h}$ | 217.0                                                     | 0.03                 |                                                                 | S2        |
| Melamine      | 2                    | Static air             | 3                                            | 550 $^{\circ}\text{C} \times 4 \text{ h}$ | 528.0                                                     | 1.14                 | Light source: four 3-W LEDs, $\lambda = 420 \text{ nm}$         | S3        |
| Melamine      | N/A                  | Static air             | 5                                            | 550 $^{\circ}\text{C} \times 4 \text{ h}$ | 437.0                                                     | 2.1<br>(405 nm)      | Light source: 100 W white LED array, $\lambda > 410 \text{ nm}$ | S4        |
| Melamine      | 0.126                | Flowing N <sub>2</sub> | 5                                            | 550 $^{\circ}\text{C} \times 4 \text{ h}$ | 270.0                                                     | 0.24                 |                                                                 | S5        |
| Melamine      | 10                   | Static air             | 3                                            | 550 $^{\circ}\text{C} \times 2 \text{ h}$ | 150.0                                                     | 0.86                 |                                                                 | S6        |

(continued)

| Precursor     | Precursor amount (g) | Synthetic atmosphere | Ramping rate ( $^{\circ}\text{C min}^{-1}$ ) | Condensation procedure                    | HER ( $\mu\text{mol g}^{-1} \text{h}^{-1}$ ) | AQE (%)           | Note                                                        | Ref. |
|---------------|----------------------|----------------------|----------------------------------------------|-------------------------------------------|----------------------------------------------|-------------------|-------------------------------------------------------------|------|
| Melamine      | N/A                  | Static air           | 3                                            | 550 $^{\circ}\text{C} \times 4 \text{ h}$ | 355.7                                        | 0.96<br>(430 nm)  | Light source: 10 W white LED,<br>$\lambda > 420 \text{ nm}$ | S7   |
| Melamine      | 3                    | Static air           | 2.3                                          | 550 $^{\circ}\text{C} \times 4 \text{ h}$ | 160.2                                        | 0.65 <sup>c</sup> |                                                             | S8   |
| Dicyandiamide | 3                    | Static air           | N/A                                          | 550 $^{\circ}\text{C} \times 4 \text{ h}$ | 180.0                                        | N/A               |                                                             | S9   |
| Melamine      | N/A                  | Static air           | 5                                            | 550 $^{\circ}\text{C} \times 2 \text{ h}$ | 355.0                                        | N/A               | Light source: 300 W Xe lamp,<br>$\lambda > 400 \text{ nm}$  | S10  |
| Dicyandiamide | 3                    | Static air           | N/A                                          | 550 $^{\circ}\text{C} \times 4 \text{ h}$ | 134.0                                        | N/A               |                                                             | S11  |
| Melamine      | 7                    | Static air           | 6.7                                          | 550 $^{\circ}\text{C} \times 4 \text{ h}$ | 98.3                                         | N/A               | Light source: 300 W Xe lamp,<br>$\lambda > 400 \text{ nm}$  | S12  |
| Melamine      | N/A                  | Static air           | N/A                                          | 550 $^{\circ}\text{C} \times 4 \text{ h}$ | 98.0                                         | N/A               |                                                             | S13  |
| Melamine      | N/A                  | Static air           | 5                                            | 550 $^{\circ}\text{C} \times 4 \text{ h}$ | 197.4 <sup>c</sup>                           | N/A               |                                                             | S14  |
| Dicyandiamide | N/A                  | Static air           | N/A                                          | 550 $^{\circ}\text{C} \times 4 \text{ h}$ | 420.0                                        | N/A               |                                                             | S15  |
| Melamine      | N/A                  | Static air           | N/A                                          | 550 $^{\circ}\text{C} \times 4 \text{ h}$ | 2355.0                                       | N/A               | Catalyst: 0.15 g/L of g-CN                                  | S16  |
| Melamine      | 2                    | Static air           | 3                                            | 550 $^{\circ}\text{C} \times 4 \text{ h}$ | 210.0                                        | N/A               |                                                             | S17  |
| Melamine      | 1.2                  | Static air           | N/A                                          | 550 $^{\circ}\text{C} \times 4 \text{ h}$ | 4.0                                          | N/A               | Scavenger: methanol (10 %)                                  | S18  |
| Dicyandiamide | N/A                  | Static air           | 5                                            | 550 $^{\circ}\text{C} \times 4 \text{ h}$ | 290.0                                        | N/A               | Light source: 300 W Xe lamp,<br>$\lambda > 400 \text{ nm}$  | S19  |
| Melamine      | 2                    | Static air           | 3                                            | 550 $^{\circ}\text{C} \times 4 \text{ h}$ | 190.0                                        | N/A               |                                                             | S20  |
| Dicyandiamide | N/A                  | Static air           | N/A                                          | 550 $^{\circ}\text{C} \times 4 \text{ h}$ | 85.0                                         | N/A               |                                                             | S21  |

(continued)

| Precursor     | Precursor amount (g) | Synthetic atmosphere | Ramping rate ( $^{\circ}\text{C min}^{-1}$ ) | Condensation procedure                    | HER ( $\mu\text{mol g}^{-1} \text{h}^{-1}$ ) | AQE (%) | Note                                                        | Ref. |
|---------------|----------------------|----------------------|----------------------------------------------|-------------------------------------------|----------------------------------------------|---------|-------------------------------------------------------------|------|
| Melamine      | 10                   | Flowing air          | 3                                            | 550 $^{\circ}\text{C} \times 2 \text{ h}$ | 63.0                                         | N/A     |                                                             | S22  |
| Melamine      | 1.2                  | Static air           | N/A                                          | 550 $^{\circ}\text{C} \times 4 \text{ h}$ | 16.0                                         | N/A     | Scavenger: methanol (10 %)                                  | S23  |
| Melamine      | 1                    | Static air           | 5                                            | 550 $^{\circ}\text{C} \times 4 \text{ h}$ | 153.9                                        | N/A     |                                                             | S24  |
| Dicyandiamide | N/A                  | Static air           | 2.3                                          | 550 $^{\circ}\text{C} \times 4 \text{ h}$ | 13.2                                         | N/A     | PHE reactor: 1 bar pressure of inert gas, not in the vacuum | S25  |
| Melamine      | 5                    | Static air           | 5                                            | 550 $^{\circ}\text{C} \times 2 \text{ h}$ | 220.0                                        | N/A     |                                                             | S26  |
| Melamine      | 10                   | Static air           | 2                                            | 550 $^{\circ}\text{C} \times 3 \text{ h}$ | 951.0                                        | N/A     |                                                             | S27  |
| Dicyandiamide | 4                    | Static air           | 5                                            | 550 $^{\circ}\text{C} \times 4 \text{ h}$ | 125.4                                        | N/A     | Light source: 300 W Xe lamp, $\lambda > 400 \text{ nm}$     | S28  |
| Melamine      | 5                    | Static air           | 5                                            | 550 $^{\circ}\text{C} \times 4 \text{ h}$ | 136.1                                        | N/A     |                                                             | S29  |
| Melamine      | 10                   | Static air           | 5                                            | 550 $^{\circ}\text{C} \times 2 \text{ h}$ | 846.0                                        | N/A     | Catalyst: 0.2 g/L of g-CN                                   | S30  |
| Melamine      | N/A                  | Static air           | 2.3                                          | 550 $^{\circ}\text{C} \times 4 \text{ h}$ | 811.0                                        | N/A     | Catalyst: 0.2 g/L of g-CN                                   | S31  |
| Melamine      | 2                    | Static air           | 2                                            | 550 $^{\circ}\text{C} \times 4 \text{ h}$ | 167.3                                        | N/A     | Light source: 300 W Xe lamp, $\lambda > 400 \text{ nm}$     | S32  |
| Melamine      | 1                    | Static air           | 2.5                                          | 550 $^{\circ}\text{C} \times 4 \text{ h}$ | 83.0                                         | N/A     |                                                             | S33  |
| Melamine      | N/A                  | Static air           | 20                                           | 550 $^{\circ}\text{C} \times 4 \text{ h}$ | 235.9                                        | N/A     |                                                             | S34  |
| Melamine      | 20                   | Static air           | N/A                                          | 550 $^{\circ}\text{C} \times 4 \text{ h}$ | 80.0                                         | N/A     | Light source: 300 W Xe lamp, $\lambda > 400 \text{ nm}$     | S35  |
| Melamine      | 5                    | Static air           | 5                                            | 550 $^{\circ}\text{C} \times 4 \text{ h}$ | 610.0                                        | N/A     |                                                             | S36  |

(continued)

| Precursor     | Precursor amount (g) | Synthetic atmosphere | Ramping rate (°C min <sup>-1</sup> ) | Condensation procedure | HER (μmol g <sup>-1</sup> h <sup>-1</sup> ) | AQE (%) | Note                                                                      | Ref. |
|---------------|----------------------|----------------------|--------------------------------------|------------------------|---------------------------------------------|---------|---------------------------------------------------------------------------|------|
| Melamine      | 10                   | Static air           | 10                                   | 550 °C × 3 h           | 60.3 <sup>c</sup>                           | N/A     |                                                                           | S37  |
| Melamine      | 2                    | Static air           | N/A                                  | 550 °C × 3 h           | 94.0                                        | N/A     | Light source: 300 W Xe lamp, λ > 400 nm                                   | S38  |
| Melamine      | 5                    | Static air           | 5                                    | 550 °C × 2 h           | 1820.0                                      | N/A     | Catalyst: 0.1 g /L of g-CN                                                | S39  |
| Melamine      | N/A                  | Static air           | 5                                    | 550 °C × 4 h           | 56.9                                        | N/A     |                                                                           | S40  |
| Dicyandiamide | N/A                  | Static air           | N/A                                  | 550 °C × 4 h           | 58.0                                        | N/A     | Catalyst: 0.125 g/L of g-CN;<br>Scavenger: methanol (50 %)                | S41  |
| Melamine      | 10                   | Static air           | N/A                                  | 550 °C × 4 h           | 1130.0                                      | N/A     | Catalyst: 0.1 g/L of g-CN                                                 | S42  |
| Melamine      | 5                    | Static air           | 2.2                                  | 550 °C × 4 h           | 98.0                                        | N/A     |                                                                           | S43  |
| Melamine      | N/A                  | Static air           | 10                                   | 550 °C × 3 h           | 450.0                                       | N/A     | Light source: 300 W Xe lamp,<br>λ > 400 nm;<br>Scavenger: methanol (20 %) | S44  |
| Melamine      | 3                    | Static air           | 0.5                                  | 550 °C × 4 h           | 150.7                                       | N/A     |                                                                           | S45  |

<sup>a</sup> For conventional PHE tests, 0.5–1 g/L of g-CN powders were used as catalysts and dispersed in deionized water, 0.5–5 wt.% (typically 3 wt.%) of Pt co-catalyst was loaded by in-situ photodeposition, 10–20 vol.% (typically 10 vol.% ) of TEOA was used as the scavenger, and the light source was commonly a 300 W Xe lamp with a long-pass cutoff filter (λ > 420 nm). [Using smaller amounts of the catalyst \(0.1–0.2 g/L\) will lead to much higher HER values, please see the column of “Note” for details.](#)

<sup>b</sup> Unless specifically indicated in the bracket, the AQEs were determined at the wavelength of 420 nm.

<sup>c</sup> The corresponding value was calculated based on the reported details, not directly mentioned in the reference.

## Supplementary References

- S1 X. Wang, K. Maeda, A. Thomas, K. Takanabe, G. Xin, J.M. Carlsson, K. Domen, M. Antonietti, *Nat. Mater.*, 2009, **8**, 76–80.
- S2 Z. Shu, Y. Wang, W. Wang, J. Zhou, T. Li, X. Liu, Y. Tan, Z. Zhao, *Int. J. Hydrogen Energy*, 2019, **44**, 748–756.
- S3 B. Zhao, J. Xu, Y. Liu, J. Fan, H. Yu, *Ceram. Int.*, 2021, **47**, 18295–18303.
- S4 J. Xia, N. Karjule, B. Mondal, J. Qin, M. Volokh, L. Xing, M. Shalom, *J. Mater. Chem. A*, 2021, **9**, 17855–17864.
- S5 X. Zhang, C. Jia, J. Liu, *Int. J. Hydrogen Energy*, 2021, **46**, 19939–19947.
- S6 X. Wu, H. Fan, W. Wang, L. Lei, X. Chang, L. Ma, *ChemSusChem*, 2022, **15**, e202201268.
- S7 X. Chi, F. Liu, Y. Gao, J. Song, R. Guan, H. Yuan, *Appl. Surf. Sci.*, 2022, **576**, 151837.
- S8 Y. Gao, Y. Li, L. Shangguan, Z. Mou, H. Zhang, D. Ge, J. Sun, F. Xia, W. Lei, *J. Colloid Interface Sci.*, 2023, **644**, 116–123.
- S9 J. Zhang, G. Zhang, X. Chen, S. Lin, L. Moehlmann, G. Dolega, G. Lipner, M. Antonietti, S. Blechert, X. Wang, *Angew. Chem., Int. Ed.*, 2012, **51**, 3183–3187.
- S10 S. Martha, A. Nashim, K.M. Parida, *J. Mater. Chem. A*, 2013, **1**, 7816–7824.
- S11 J. Zhang, M. Zhang, S. Lin, X. Fu, X. Wang, *J. Catal.*, 2014, **310**, 24–30.
- S12 J. Fang, H. Fan, M. Li, C. Long, *J. Mater. Chem. A*, 2015, **3**, 13819–13826.
- S13 Q. Han, C. Hu, F. Zhao, Z. Zhang, N. Chen, L. Qu, *J. Mater. Chem. A*, 2015, **3**, 4612–4619.
- S14 Z.-F. Huang, J. Song, L. Pan, Z. Wang, X. Zhang, J.-J. Zou, W. Mi, X. Zhang, L. Wang,

- Nano Energy*, 2015, **12**, 646–656.
- S15 Q. Liang, Z. Li, Z.-H. Huang, F. Kang, Q.-H. Yang, *Adv. Funct. Mater.*, 2015, **25**, 6885–6892.
- S16 S.N. Guo, Y. Zhu, Y.Y. Yan, Y.L. Min, J.C. Fan, Q.J. Xu, *Appl. Catal., B*, 2016, **185**, 315–321.
- S17 K. Li, X. Xie, W.-D. Zhang, *Carbon*, 2016, **110**, 356–366.
- S18 L. Lin, H. Ou, Y. Zhang, X. Wang, *ACS Catal.*, 2016, **6**, 3921–3931.
- S19 L. Shi, K. Chang, H. Zhang, X. Hai, L. Yang, T. Wang, J. Ye, *Small*, 2016, **12**, 4431–4439.
- S20 P.-W. Chen, K. Li, Y.-X. Yu, W.-D. Zhang, *Appl. Surf. Sci.*, 2017, **392**, 608–615.
- S21 M.R. Gholipour, F. Bédard, T.-O. Do, *ACS Sustainable Chem. Eng.*, 2017, **5**, 213–220.
- S22 J. Oh, J.M. Lee, Y. Yoo, J. Kim, S.-J. Hwang, S. Park, *Appl. Catal., B*, 2017, **218**, 349–358.
- S23 H. Ou, L. Lin, Y. Zheng, P. Yang, Y. Fang, X. Wang, *Adv. Mater.*, 2017, **29**, 1700008.
- S24 H. Wang, B. Wang, Y. Bian, L. Dai, *ACS Appl. Mater. Interfaces*, 2017, **9**, 21730–21737.
- S25 Y. Wang, M.K. Bayazit, S.J.A. Moniz, Q. Ruan, C.C. Lau, N. Martsinovich, J. Tang, *Energy Environ. Sci.*, 2017, **10**, 1643–1651.
- S26 P. Hu, C. Chen, R. Zeng, J. Xiang, Y. Huang, D. Hou, Q. Li, Y. Huang, *Nano Energy*, 2018, **50**, 376–382.
- S27 J. Liu, W. Fang, Z. Wei, Z. Qin, Z. Jiang, W. Shanguan, *Appl. Catal., B*, 2018, **238**, 465–470.
- S28 C. Wang, H. Fan, X. Ren, J. Ma, J. Fang, W. Wang, *ChemSusChem*, 2018, **11**, 700–708.
- S29 H. Wang, Y. Bian, J. Hu, L. Dai, *Appl. Catal., B*, 2018, **238**, 592–598.

- S30 F. Wei, Y. Liu, H. Zhao, X. Ren, J. Liu, T. Hasan, L. Chen, Y. Li, B.-L. Su, *Nanoscale*, 2018, **10**, 4515–4522.
- S31 C. Zhao, Z. Chen, J. Xu, Q. Liu, H. Xu, H. Tang, G. Li, Y. Jiang, F. Qu, Z. Lin, X. Yang, *Appl. Catal., B*, 2019, **256**, 117867.
- S32 J. Fu, Z. Mo, M. Cheng, F. Xu, Y. Song, X. Ding, Z. Chen, H. Chen, H. Li, H. Xu, *Colloids Surf. A Physicochem. Eng. Asp.*, 2020, **589**, 124397.
- S33 J. Wu, C. Li, H. Dong, H. Zhang, J. Han, L. Wang, S. Yu, Y. Wang, *Renewable Energy*, 2020, **157**, 660–669.
- S34 Y.-H. Xu, G. Xu, M.-Y. Sun, K. Wang, *Chem. Pap.*, 2020, **74**, 4067–4074.
- S35 Q. Zeng, X. Wang, M. Jin, E. Akinoglu, G. Zhou, L. Shui, *J. Colloid Interface Sci.*, 2020, **578**, 788–795.
- S36 C. Han, P. Su, B. Tan, X. Ma, H. Lv, C. Huang, P. Wang, Z. Tong, G. Li, Y. Huang, Z. Liu, *J. Colloid Interface Sci.*, 2021, **581**, 159–166.
- S37 L. Luo, K. Wang, Z. Gong, H. Zhu, J. Ma, L. Xiong, J. Tang, *Int. J. Hydrogen Energy*, 2021, **46**, 27014–27025.
- S38 S. Zhao, Y. Liu, Y. Wang, L. Xie, J. Fang, Y. Zhang, Y. Zhou, S. Zhuo, *ACS Appl. Energy Mater.*, 2021, **4**, 1784–1792.
- S39 J. Ding, L. Song, X. Li, L. Chen, X. Li, J. Sun, X. Zhang, Y. Wang, X. Tian, *ACS Appl. Energy Mater.*, 2022, **5**, 8800–8811.
- S40 L. Bao, Y. Liu, Z. Yu, Y. Xue, S. Yan, H. Gao, *Mater. Today Chem.*, 2022, **26**, 101084.
- S41 H. Wang, M. Thangamuthu, Z. Wu, J. Yang, H. Yuan, M.K. Bayazit, J. Tang, *Chem. Eng. J.*,

2022, **445**, 136790.

S42 F. Yang, S. Wang, Z. Li, Y. Xu, W. Yang, C. Yv, D. Yang, Y. Xie, W. Zhou, *J. Colloid Interface Sci.*, 2022, **613**, 775–785.

S43 H. Zhang, Y. Cao, Z. Li, Y. Gao, L. Shangguan, J. Sun, L. Lang, W. Lei, *J. Catal.*, 2023, **417**, 360–367.

S44 S. Tang, S. Yang, Y. Chen, Y. Yang, Z. Li, L. Zi, Y. Liu, Y. Wang, Z. Li, Z. Fu, Y. Li, *Carbon*, 2023, **201**, 815–828.

S45 H. Yang, S. Sun, R. Duan, B. Yang, M. Yang, X. Qi, C. Cai, D. Yun, Q. Yang, J. Cui, *Appl. Surf. Sci.*, 2023, **631**, 157544.
